# Supplementary material
Source: PubMed Central journal article supplement (PMC7205988)
Supplement: 11357_2020_167_MOESM1_ESM.pdf [file 11357_2020_167_MOESM1_ESM.pdf]

# **Pharmacotherapy to Gene Editing: Potential Therapeutic Approaches for Hutchinson-Gilford Progeria Syndrome**

Journal name: GeroScience

Manuscript Number: JAAA-D-19-00223

Saurabh Saxena<sup>1#</sup>, Sanjeev Kumar<sup>2</sup>

<sup>1</sup>Department of Medical Laboratory Sciences, Lovely Professional University, Jalandhar – Delhi G.T. Road, Phagwara, Punjab, India – 144411

<sup>2</sup>Faculty of Technology and Sciences, Lovely Professional University, Jalandhar – Delhi G.T. Road, Phagwara, Punjab, India – 144411

#Email of corresponding author: [drsaurabh.bio@gmail.com](mailto:drsaurabh.bio@gmail.com)

Phone number: +91-7073216026

Table S1: Potential treatment strategies for HGPS and their assessment in different disease models.

Abbreviations: 1,25 D, 1 $\alpha$ , 25-dihydroxy vitamin D<sub>3</sub>; AFC, N-acetyl-S-farnesyl-l-cysteine; AMPK, adenosine monophosphate-activated protein kinase; ATM, ataxia-telangiectasia-mutated); ATRA, all-trans retinoic acid; CK2, Casein kinase 2; COL3, Collagen type III; CRISPR, clustered regularly interspaced short palindromic repeats; CRM1, Chromosomal region maintenance 1; DOT1L, Disruptor of telomeric silencing 1-like; DSB, double strand break; ECM, Extracellular Matrix; ER, endoplasmic reticulum; FDPS, farnesyl diphosphate synthase; FTI, farnesyl transferase inhibitors; GH, growth hormone; H3K27me<sub>3</sub>, histone H3 trimethylated on lysine 27; HSCs, hematopoietic stem cells; ICMT, Isoprenylcysteine carboxyl methyltransferase; IGF-1, insulin-like growth factor-1; IKK complex, I $\kappa$ B kinase complex; iPSC, induced pluripotent cell; iPSC-EVs, extracellular vesicles derived from induced pluripotent cells; MAF: mouse adult fibroblast; MDSPCs, muscle-derived stem/progenitor cells; MEF, mouse embryonic fibroblast; MIAMI cells, marrow isolated adult multilineage inducible cells; MMP, mitochondrial membrane potential; mono-AP, mono-aminopyrimidines; MRTF-A, myocardin related transcription factorA; MSC, mesenchymal stem cells; MSC-EVs, Extracellular vesicles derived from healthy mesenchymal stem cells; mTOR, mammalian target of rapamycin; NAT10, N-acetyltransferase 10; NRF-2, Nuclear factor erythroid 2-related factor 2; OSKM: *Oct4*, *Sox2*, *Klf4*, and *c-Myc*; ROS, reactive oxygen species; ROCK, Rho-associated protein kinase; SASP, senescence-associated secretory phenotype; SIRT1 and 6, sirtuin-1 and -6; SRF, serum response factor; SRSF-1 and -5, serine/arginine-rich splicing factor-1 and -5; UTR, untranslated region; VSMC, vascular smooth muscle cells.

| Therapeutic approach / Treatment         | Target molecule/function                 | Affected pathway      | Therapeutic effects                                                                                                                                                                                                             | Model of study                                                                                                                                                                                                                                                | Reference                                                                                                                                     |
|------------------------------------------|------------------------------------------|-----------------------|---------------------------------------------------------------------------------------------------------------------------------------------------------------------------------------------------------------------------------|---------------------------------------------------------------------------------------------------------------------------------------------------------------------------------------------------------------------------------------------------------------|-----------------------------------------------------------------------------------------------------------------------------------------------|
| <i>Drug based therapeutic approaches</i> |                                          |                       |                                                                                                                                                                                                                                 |                                                                                                                                                                                                                                                               |                                                                                                                                               |
| FTI                                      | Inhibitor of farnesyl transferase enzyme | Prelamin A processing | <p>Ameliorated nuclear shape defects, mis-localization of prelamin A away from nuclear rim, improved chromosome positioning and tethering of telomeres to the nucleoskeleton</p> <p>Improved ATP synthesis and COX/CS ratio</p> | <p>Skin fibroblast from HGPS patient, <i>Zmpste24<sup>-/-</sup></i> MEF, <i>Lmna<sup>HG/HG</sup></i> and <i>Lmna<sup>HG/+</sup></i> MEF</p> <p>Mouse adult fibroblast (MAF) from <i>Zmpste24<sup>-/-</sup></i> and <i>Lmna<sup>G609G/G609G</sup></i> mice</p> | <p>(Bikkul et al. 2018; Capell et al. 2005; Glynn and Glover 2005; Toth et al. 2005; Yang et al. 2005)</p> <p>(Rivera-Torres et al. 2013)</p> |

|  |  |  |                                                                                                                                                                                                                                                                                                                   |                                                                                                                                                    |                                                                                                      |
|--|--|--|-------------------------------------------------------------------------------------------------------------------------------------------------------------------------------------------------------------------------------------------------------------------------------------------------------------------|----------------------------------------------------------------------------------------------------------------------------------------------------|------------------------------------------------------------------------------------------------------|
|  |  |  | <p>Improved self-renewal capacity, increased cell migration, decreased cell stiffness</p> <p>Extended life span, increased body weight, improved muscle and bone strength</p> <p>Extended life span, increased body weight, improved bone mineralization and cortical thickness, elevated adipose tissue mass</p> | <p>Marrow Isolated Adult Multilineage Inducible (MIAMI) cells</p> <p><i>Zmpste24</i><sup>-/-</sup> mice</p> <p><i>Lmna</i><sup>HG/+</sup> mice</p> | <p>(Pacheco et al. 2014)</p> <p>(Fong et al. 2006a)</p> <p>(Yang et al. 2006; Yang et al. 2008b)</p> |
|--|--|--|-------------------------------------------------------------------------------------------------------------------------------------------------------------------------------------------------------------------------------------------------------------------------------------------------------------------|----------------------------------------------------------------------------------------------------------------------------------------------------|------------------------------------------------------------------------------------------------------|

|                                                     |                                                                                                                                                 |                       |                                                                                                                                                                                                                                                                                   |                                                                                                                |                                                  |
|-----------------------------------------------------|-------------------------------------------------------------------------------------------------------------------------------------------------|-----------------------|-----------------------------------------------------------------------------------------------------------------------------------------------------------------------------------------------------------------------------------------------------------------------------------|----------------------------------------------------------------------------------------------------------------|--------------------------------------------------|
|                                                     |                                                                                                                                                 |                       | Delayed onset and progression of cardiovascular disease                                                                                                                                                                                                                           | BAC <i>Lmna</i> <sup>G608G</sup> mice                                                                          | (Capell et al. 2008)                             |
| Combined treatment of Amino bisphosphonate + Statin | Amino bisphosphonate inhibits farnesyl pyrophosphate synthase and isopentenyl pyrophosphate isomerase. Statins are HMG-CoA reductase inhibitor. | Prelamin A processing | Ameliorated nuclear morphological defects, inhibition of formation lamin A/C nucleoplasmic aggregates, partial rescue of DNA damage<br><br>Extended life span, increased size and body weight, improved bone mineralization and cortical thickness, reduced nuclear abnormalities | Skin fibroblast from HGPS patient, <i>Zmpste24</i> -deficient cells<br><br><i>Zmpste24</i> <sup>-/-</sup> mice | (Varela et al. 2008)<br><br>(Varela et al. 2008) |

|                           |                          |           |                                                                                                                                                                                                                                                                                  |                                                                                                                            |                                                                                  |
|---------------------------|--------------------------|-----------|----------------------------------------------------------------------------------------------------------------------------------------------------------------------------------------------------------------------------------------------------------------------------------|----------------------------------------------------------------------------------------------------------------------------|----------------------------------------------------------------------------------|
|                           |                          |           | Improved ATP synthesis and COX/CS ratio                                                                                                                                                                                                                                          | Mouse adult fibroblast (MAF) from <i>Zmpste24</i> <sup>-/-</sup> and <i>Lmna</i> <sup>G609G/G609G</sup> mice               | (Rivera-Torres et al. 2013)                                                      |
| Rapamycin and its analogs | mTOR signaling inhibitor | Autophagy | <p>Delayed senescence, rescued nuclear blebbing, reduced progerin level</p> <p>Reduced progerin level, restored nuclear integrity and chromatin organization</p> <p>Increased progerin clearance, restored nuclear shape, increase cell growth, partially rescued DNA damage</p> | <p>Skin fibroblast from HGPS patient</p> <p>Skin fibroblast from HGPS patient</p> <p>Skin fibroblast from HGPS patient</p> | <p>(Cao et al. 2011)</p> <p>(Cenni et al. 2011)</p> <p>(Gabriel et al. 2016)</p> |

|     |                            |                       |                                                                                                                                                        |                                                    |                        |
|-----|----------------------------|-----------------------|--------------------------------------------------------------------------------------------------------------------------------------------------------|----------------------------------------------------|------------------------|
|     |                            |                       | Improved cell proliferation,<br>decreased nuclear lobulation,<br>reduced senescence.                                                                   | Skin fibroblast from HGPS<br>patient               | (DuBose et al. 2018)   |
|     |                            |                       | Reduced DNA damage                                                                                                                                     | Skin fibroblast from HGPS<br>patient               | (Bikkul et al. 2018)   |
|     |                            |                       | Reduced senescence & apoptosis,<br>improved myogenic and<br>chondrogenic differentiation<br>potential, decreased adipogenic<br>differentiation ability | MDSPCs from <i>Zmpste24</i> <sup>-/-</sup><br>mice | (Kawakami et al. 2019) |
| AFC | Competitive ICMT inhibitor | Prelamin A processing | Increased cell proliferation                                                                                                                           | Skin fibroblast from HGPS<br>patient               | (Ibrahim et al. 2013)  |

|                                |                                                                       |                                          |                                                                                                                                                                     |                                                                                      |                                            |
|--------------------------------|-----------------------------------------------------------------------|------------------------------------------|---------------------------------------------------------------------------------------------------------------------------------------------------------------------|--------------------------------------------------------------------------------------|--------------------------------------------|
| Mono-AP                        | Inhibitor of Farnesyl pyrophosphate synthase and farnesyl transferase | Prelamin A farnesylation and prenylation | Rescued nuclear defects, ameliorated premature differentiation of HGPS-MSC into osteoblastic lineage.                                                               | Mesenchymal stem cells (MSC) derived from HGPS-iPSCs, HGPS patient dermal fibroblast | (Blondel et al. 2016)                      |
| All-trans retinoic acid (ATRA) | Retinoic acid responsive element,                                     | Autophagy                                | Reduced progerin as well as lamin A accumulation, decreased DNA damage, restored nuclear structure, enhanced cell proliferation (Synergistic action with rapamycin) | Skin fibroblast from HGPS patient                                                    | (Pellegrini et al. 2015)                   |
| Sulforaphane                   | Inducer of antioxidant enzymes                                        | Oxidative stress, autophagy              | Reduced nuclear blebbing, decreased ROS and DNA damage, increased cell proliferation rate, increased progerin clearance, increase in intracellular ATP              | Skin fibroblast from HGPS patient                                                    | (Gabriel et al. 2015; Gabriel et al. 2017) |



|           |                                                                 |                                                                              |                                                                                                                                                                                                                           |                                                                                                                                                                   |                                                                                    |
|-----------|-----------------------------------------------------------------|------------------------------------------------------------------------------|---------------------------------------------------------------------------------------------------------------------------------------------------------------------------------------------------------------------------|-------------------------------------------------------------------------------------------------------------------------------------------------------------------|------------------------------------------------------------------------------------|
| MG132     | Proteasome inhibitor,<br><br>Regulates SRSF-1 and<br><br>SRSF-5 | Autophagy, Aberrant<br><br>splicing of <i>LMNA</i>                           | Decreased progerin level, reduced<br><br>abnormal nuclei, delayed<br><br>senescence, increased cell<br><br>proliferation, lowered DNA damage<br><br>and heterochromatin loss.<br><br><br><br>Increased progerin clearance | Skin fibroblast from HGPS<br><br>patient<br><br><br><br><br><br><br><br><br><br>HGPS iPSC-derived MSC<br>and VSMC, <i>Lmna</i> <sup>G609G/G609G</sup><br><br>mice | (Harhour et al. 2017)<br><br><br><br><br><br><br><br><br><br>(Harhour et al. 2017) |
| Metformin | Regulates SRSF-1, Activates<br><br>AMPK                         | Aberrant splicing of<br><br><i>LMNA</i> , AMPK cell<br><br>signaling pathway | Decreased SRSF-1 and progerin<br><br>expression, reduced abnormal<br><br>nuclei, lowered premature<br><br>osteogenic differentiation of HGPS-<br><br>MSCs, reduced ROS and DNA<br><br>damage, retarded senescence,        | Mouse <i>Lmna</i> <sup>G609G/G606G</sup><br><br>fibroblast, HGPS-MSCs,<br><br>Skin fibroblast from HGPS<br><br>patient                                            | (Egesipe et al. 2016; Park and Shin 2017)                                          |

|                   |                                            |                                               |                                                                                                                                                                                                                                                            |                                                                                                 |                        |
|-------------------|--------------------------------------------|-----------------------------------------------|------------------------------------------------------------------------------------------------------------------------------------------------------------------------------------------------------------------------------------------------------------|-------------------------------------------------------------------------------------------------|------------------------|
|                   |                                            |                                               | increased splenocyte proliferation, enhanced antioxidant expression                                                                                                                                                                                        |                                                                                                 |                        |
| JH4               | Binding with C-terminal region of progerin | Lamin A-progerin interaction                  | Rescued cell cycle arrest, restored H3K9me3 level, alleviated nuclear defects in HGPS cells. Enhanced life span of mice, improved body weight, increased muscle strength, raised cell density, restored tissue growth morphology in thymus and spleen etc. | <i>Lmna</i> <sup>+/<i>G609G</i></sup> and <i>Lmna</i> <sup><i>G609G/G609G</i></sup> mutant mice | (Lee et al. 2016b)     |
| N-acetyl cysteine | ROS scavenger                              | Oxidative stress                              | Depletion of DNA DSB load, improved cell proliferation rate                                                                                                                                                                                                | Skin fibroblast from HGPS patient                                                               | (Richards et al. 2011) |
| Methylene blue    | Improves mitochondrial function            | Mitochondrial biogenesis and oxidative stress | Induced cell proliferation, ameliorated nuclear blebbing, reduced ROS production, improved mitochondrial function, alleviated                                                                                                                              | Skin fibroblast from HGPS patient                                                               | (Xiong et al. 2016)    |

|                     |                                                            |                  |                                                                                                                                                                                                     |                                                                                                                                        |                                                  |
|---------------------|------------------------------------------------------------|------------------|-----------------------------------------------------------------------------------------------------------------------------------------------------------------------------------------------------|----------------------------------------------------------------------------------------------------------------------------------------|--------------------------------------------------|
|                     |                                                            |                  | senescence, decreased heterochromatin loss, corrected gene expression                                                                                                                               |                                                                                                                                        |                                                  |
| Oltipraz            | NRF2 activator                                             | Oxidative stress | Ameliorated the defects in certain lamina associated proteins and H3K27me3<br><br>Decreased ROS production, increased NRF2 regulated antioxidant gene expression, reduced number of apoptotic cells | Human skin fibroblast from HGPS patients<br><br>MSC derived from HGPS-iPSC implanted into <i>tibialis anterior</i> muscle of SCID mice | (Kubben et al. 2016)<br><br>(Kubben et al. 2016) |
| Y-27632 and Fasudil | Inhibitor of Rho-associated protein kinase (ROCK) activity | Oxidative stress | Decreased ROS production, increased MMP, improved mitochondrial function, reduced DNA DSB and ameliorated nuclear                                                                                   | Skin fibroblast from HGPS patients                                                                                                     | (Kang et al. 2017; Park et al. 2018)             |

|                   |                                  |                                         |                                                                                                                                                                                                                                 |                                                                        |                      |
|-------------------|----------------------------------|-----------------------------------------|---------------------------------------------------------------------------------------------------------------------------------------------------------------------------------------------------------------------------------|------------------------------------------------------------------------|----------------------|
|                   |                                  |                                         | defects, increased cell proliferation, reduced senescence.                                                                                                                                                                      |                                                                        |                      |
| KU-60019          | ATM inhibitor                    | Metabolic reprogramming in mitochondria | improved mitochondrial function, decrease in ROS, reduced senescence associated markers                                                                                                                                         | Skin fibroblast from HGPS patient                                      | (Kuk et al. 2019)    |
| Sodium salicylate | Inhibitor of the IKK complex     | Blocking of NF- $\kappa$ B activation   | Extended longevity, improved body weight, improved bone architecture, enhanced cell proliferation, increased subcutaneous fat layer thickness, raised normal hair follicles in the skin, inhibited thymic and spleen involution | <i>Lmna</i> <sup>G609G/G609G</sup> and <i>Zmpste24</i> -deficient mice | (Osorio et al. 2012) |
| Baricitinib       | Inhibition of JAK-STAT Signaling | Inflammatory pathways belonging to SASP | Reduction of proinflammatory factors, activation of proteasomes and autophagy, lowered progerin expression, increased proliferation,                                                                                            | Skin fibroblast from HGPS patients                                     | (Liu et al. 2019a)   |

|                  |                        |                                                 |                                                                                                                                                                            |                                            |                                                  |
|------------------|------------------------|-------------------------------------------------|----------------------------------------------------------------------------------------------------------------------------------------------------------------------------|--------------------------------------------|--------------------------------------------------|
|                  |                        |                                                 | reduced senescence, decreased ROS level, restored cellular ATP levels                                                                                                      |                                            |                                                  |
| Chloroquine      | Increases ATM activity | DNA damage response and SIRT6 pathway           | Decrease in DNA damage, retarded loss of body weight, enhanced running endurance, extended lifespan.                                                                       | <i>Zmpste24</i> <sup>-/-</sup> mouse model | (Qian et al. 2018)                               |
| 1,25D/calcitriol | vitamin D receptors    | Correction of replicative stress and DNA damage | Ameliorated nuclear and DNA damage repair defects, improved cellular senescence                                                                                            | Skin fibroblast from HGPS patient          | (Kreienkamp et al. 2016; Kreienkamp et al. 2018) |
| Remodelin        | NAT10 inhibitor        | Microtubular rearrangement                      | Improved nuclear morphology, restored normal nucleocytoplasmic transport, reduced DNA damage, enhanced cell proliferation, rebalanced gene expression in HGPS fibroblasts. | Skin fibroblast from HGPS patient          | (Larrieu et al. 2014; Larrieu et al. 2018)       |

|           |                         |                                                                                                                  |                                                                                                      |                                                                            |                      |
|-----------|-------------------------|------------------------------------------------------------------------------------------------------------------|------------------------------------------------------------------------------------------------------|----------------------------------------------------------------------------|----------------------|
|           |                         |                                                                                                                  | Increased life span, reduced loss of body weight, improved cardiac function in progeroid mouse model | Homo- and hetero-zygous <i>Lmna</i> <sup>G609G</sup> progeroid mouse model | (Balmus et al. 2018) |
| Quercetin | Multiple including NRF2 | Multiple pathways, majorly of cell cycle, nuclear division, NRF2 antioxidant and chromosome segregation pathways | Reduced cellular senescence, improved cell proliferation (synergistic effect with vitamin C)         | Human HGPS-hMSC                                                            | (Geng et al. 2018)   |
| Vitamin C | Multiple                | Multiple pathways including oxidative stress, telomere attrition, inflammation, nuclear lamina and               | reduced cellular senescence, improved cell proliferation (synergistic effect with quercetin)         | Human HGPS-MSC                                                             | (Geng et al. 2018)   |

|                     |                        |                                                                                                                                          |                                                                                                                                                                       |                                            |                        |
|---------------------|------------------------|------------------------------------------------------------------------------------------------------------------------------------------|-----------------------------------------------------------------------------------------------------------------------------------------------------------------------|--------------------------------------------|------------------------|
|                     |                        | heterochromatin reorganization                                                                                                           |                                                                                                                                                                       |                                            |                        |
| Resveratrol         | SIRT1 activator        | Deacetylase activity                                                                                                                     | Decreased adult stem cell depletion, reduced body weight loss, improves bone structure and mineral density, extended life span                                        | <i>Zmpste24</i> <sup>-/-</sup> mouse model | (Liu et al. 2012)      |
| MS-275 (entinostat) | Class I HDAC inhibitor | Lamin A/C-HDAC2 interaction                                                                                                              | Improved histone acetylation status of the cell                                                                                                                       | Skin fibroblast from HGPS patient          | (Mattioli et al. 2019) |
| Spermidine          | Activation of CK2      | Multiple pathways <i>viz.</i> cell proliferation, cell survival, cell differentiation and development, apoptosis, DNA repair <i>etc.</i> | Increased CK2 activity, reduced p16 <sup>Ink4a</sup> expression & SA-β-gal activity (reduced senescence), decreased DNA damage marker level, improved DDR and repair. | <i>Zmpste24</i> <sup>-/-</sup> MEFs        | (Ao et al. 2019)       |

|                         |                                                       |                       |                                                                                                                                 |                                                      |                       |
|-------------------------|-------------------------------------------------------|-----------------------|---------------------------------------------------------------------------------------------------------------------------------|------------------------------------------------------|-----------------------|
|                         |                                                       |                       | Increased body weight, extended life span, lesser rib fractures, increased bone density                                         | <i>Zmpste24</i> <sup>-/-</sup> mice                  | (Ao et al. 2019)      |
| S-adenosyl-methionine   | Alternative source of purine                          | AMP production        | Increased proliferative capacity and reduced senescence associated markers                                                      | Skin fibroblast from HGPS patient                    | (Mateos et al. 2018)  |
| Recombinant human IGF-1 | Balance between IGF-1 and growth hormone              | Somatotroph signaling | Increased life span, improved body weight, increase in the amount of subcutaneous fat, reduced level of kyphosis, and alopecia. | <i>Zmpste24</i> <sup>-/-</sup> mice                  | (Mariño et al. 2010)  |
| ABT-737                 | Inhibitor of anti-apoptotic proteins BCL-W and BCL-XL | Apoptosis             | Decrease in senescent cells, lowering of molecular markers of senescence, reduced inflammation, increased life span             | <i>Lmna</i> <sup>+/<i>G609G</i></sup> progeroid mice | (Ovadya et al. 2018)  |
| 0.1% cholic acid        | Bile acid metabolism                                  | Lipid metabolism      | Increased life span, retarded hindlimb stiffness, enhanced daily                                                                | <i>Zmpste24</i> <sup>-/-</sup> mice                  | (Bárcena et al. 2018) |



|                           |                                            |                                                |                                                                                                                                          |                                                                                   |                              |
|---------------------------|--------------------------------------------|------------------------------------------------|------------------------------------------------------------------------------------------------------------------------------------------|-----------------------------------------------------------------------------------|------------------------------|
|                           |                                            |                                                | movement, bigger size, milder loss of weight, reduced loss of hair, lowered cervicothoracic lordokyphosis, decreased loss of body weight |                                                                                   |                              |
| Tauroursodeoxycholic acid | Improves protein folding                   | ER stress                                      | Extended life span, ameliorated vascular pathology                                                                                       | <i>ApoE</i> <sup>-/-</sup><br><i>Lmna</i> <sup>LCS/LCS</sup> <i>SM22αCre</i> mice | (Hamczyk et al. 2019)        |
| Pamidronate               | Inhibitor of FDPS                          | Progerin/PLA2R1/p53/<br>FDPS prosenescent axis | Reduced senescence, increased cell proliferation, improved nuclear morphology                                                            | Primary culture of human dermal fibroblasts from HGPS patients                    | (Griveau et al. 2018)        |
| Exogenous pyrophosphate   | Inhibition of calcium phosphate deposition | Pyrophosphate homeostasis                      | Reduced aortic calcification                                                                                                             | <i>Lmna</i> <sup>G609G/G609G</sup> mice                                           | (Villa-Bellosta et al. 2013) |
| Leptomycin B              | CRM1 inhibitor                             | Nuclear export                                 | Decreased nuclear blebbing, improved lamin B1 expression, reduced cellular senescence,                                                   | Primary culture of human dermal fibroblasts                                       | (García-Aguirre et al. 2019) |

|                                |                                                                                    |                              |                                                                                                                                                                                                                                    |                                         |                       |
|--------------------------------|------------------------------------------------------------------------------------|------------------------------|------------------------------------------------------------------------------------------------------------------------------------------------------------------------------------------------------------------------------------|-----------------------------------------|-----------------------|
|                                |                                                                                    |                              | lowered heterochromatin loss, alleviated expansion of nucleoli.                                                                                                                                                                    |                                         |                       |
| BRL37344                       | $\beta_3$ -adrenergic receptor ( $\beta_3$ -AR) agonist                            | Bone marrow microenvironment | Restore lympho-myeloid skewing of HSCs, improved number of circulating granulocytes and lymphocytes, reestablished bone marrow neutrophils, partially restored bone marrow B cells, improved association of megakaryocytes to HSCs | <i>Lmna</i> <sup>G609G/G609G</sup> mice | (Horet al. 2019)      |
| <i>Dietary interventions</i>   |                                                                                    |                              |                                                                                                                                                                                                                                    |                                         |                       |
| Methionine restriction in diet | Suppression of GH/IGF1 somatotrophic axis and mTOR pathway, enhances AMPK activity | Metabolic homeostasis        | Increased life span, reduced DNA damage and inflammation, retardation in the appearance of lordokyphosis and loss of grooming, improvement in bone structure and                                                                   | <i>Lmna</i> <sup>G609G/G609G</sup> mice | (Bárcena et al. 2018) |

|                |                  |                                         |                                                                                                                                                                                                                                                                                                                                                                                                           |                                                   |                          |
|----------------|------------------|-----------------------------------------|-----------------------------------------------------------------------------------------------------------------------------------------------------------------------------------------------------------------------------------------------------------------------------------------------------------------------------------------------------------------------------------------------------------|---------------------------------------------------|--------------------------|
|                |                  |                                         | <p>mineral density, augmented tissue architecture in muscle, modulation of respiration rates and energy expenditure, restoration of gene expression, escalates metabolism and lipid profile, increase in bile acid level in <i>LMNA</i><sup>G609G/G609G</sup> mice.</p> <p>Increased life span, decreased loss of hair, improved cervicothoracic lordokyphosis in <i>Zmpste24</i><sup>-/-</sup> mice.</p> | <i>Zmpste24</i> <sup>-/-</sup> mice               | (Bárcena et al. 2018)    |
| Sodium nitrite | Nitric oxide     | Nitric oxide signaling                  | Ameliorated vascular stiffness and inward remodeling                                                                                                                                                                                                                                                                                                                                                      | <i>Lmna</i> <sup>G609G/G609G</sup> progeroid mice | (del Campo et al. 2019)  |
| High-fat diet  | Lipid metabolism | Multiple pathways related to metabolism | Nearly doubled life span, reduction in body weight loss, increase in body fat and adipocyte size,                                                                                                                                                                                                                                                                                                         | <i>Lmna</i> <sup>G609G/G609G</sup> progeroid mice | (Kreienkamp et al. 2019) |

|                                                                            |                      |                                           |                                                                                                                            |                                             |                        |
|----------------------------------------------------------------------------|----------------------|-------------------------------------------|----------------------------------------------------------------------------------------------------------------------------|---------------------------------------------|------------------------|
|                                                                            |                      |                                           | ameliorated metabolic alterations, improved expression of genes associated with cachexia                                   |                                             |                        |
| Oral supplementation of fecal microbiota obtained from healthy individuals | Intestinal dysbiosis | Bile acid metabolism (possible mechanism) | Increased body weight, improved body temperatures, ameliorated blood glucose level, extended life span                     | <i>Lmna</i> <sup>G609G/G609G</sup> mice and | (Bárcena et al. 2019b) |
| Oral supplementation of Verrucomicrobia <i>Akkermansia</i>                 | Intestinal dysbiosis | Bile acid metabolism (possible mechanism) | Extended life span, improved body weight and size, less pronounced cervicothoracic lordokyphosis, ameliorated hypoglycemia | <i>Zmpste24</i> <sup>-/-</sup> mice         | (Bárcena et al. 2019b) |

|                                     |                      |                  |                                                                                                                                                                                                                                                     |                                                                                         |                                                             |
|-------------------------------------|----------------------|------------------|-----------------------------------------------------------------------------------------------------------------------------------------------------------------------------------------------------------------------------------------------------|-----------------------------------------------------------------------------------------|-------------------------------------------------------------|
| <i>muciniphila</i>                  |                      |                  | <p>Increased expression of Reg3g in Ileum, thickened intestinal mucosa layer, enhanced expression of wound healing factor (<i>Tff3</i>) in the intestine, improvement metabolome profile in the ileum</p> <p>Improved life span and body weight</p> | <p><i>Lmna</i><sup>G609G/G609G</sup> mice</p> <p><i>Zmpste24</i><sup>-/-</sup> mice</p> | <p>(Bárcena et al. 2019b)</p> <p>(Bárcena et al. 2019b)</p> |
| <i>Other approaches</i>             |                      |                  |                                                                                                                                                                                                                                                     |                                                                                         |                                                             |
| Constitutively active NRF2 (caNRF2) | Reactivation of NRF2 | Oxidative stress | <p>Decreased ROS production, increased NRF2 regulated antioxidant gene expression, reduced progerin expression, improved expression of lamina associated proteins</p>                                                                               | Human skin fibroblast from HGPS patients                                                | (Kubben et al. 2016)                                        |

|                                     |                   |                                                                |                                                                                                                                                       |                                                                                 |                       |
|-------------------------------------|-------------------|----------------------------------------------------------------|-------------------------------------------------------------------------------------------------------------------------------------------------------|---------------------------------------------------------------------------------|-----------------------|
|                                     |                   |                                                                | Enhanced expression levels of NRF2-controlled antioxidant genes, reduced ROS levels, improved nuclear architecture, lowered number of apoptotic cells | MSC derived from HGPS-iPSC implanted into tibialis anterior muscle of SCID mice | (Kubben et al. 2016)  |
| Short hairpin (sh) RNA against ICMT | ICMT              | Prelamin A processing                                          | Delayed senescence, increased cell proliferation rate                                                                                                 | Human skin fibroblast from HGPS patient                                         | (Ibrahim et al. 2013) |
| Short hairpin (sh) RNA against LMNA | LMNA gene         | Progerin expression                                            | Amelioration of morphological defects in nucleus, increased cell proliferation, reduced numbers of senescent cells                                    | Human skin fibroblast from HGPS patients                                        | (Huang et al. 2005)   |
| CK2 $\alpha$ overexpression         | Activation of CK2 | Multiple pathways viz. cell proliferation, cell survival, cell | Reduced $\beta$ -gal-positive cells & p16 <sup>Ink4a</sup> level (decreased senescence)                                                               | <i>Zmpste24</i> <sup>-/-</sup> CK2 $\alpha$ <sup>TG</sup> MEFs                  | (Ao et al. 2019)      |

|                      |                                                                                           |                                                                    |                                                                                                                                                                                                                  |                                                                                          |                                                    |
|----------------------|-------------------------------------------------------------------------------------------|--------------------------------------------------------------------|------------------------------------------------------------------------------------------------------------------------------------------------------------------------------------------------------------------|------------------------------------------------------------------------------------------|----------------------------------------------------|
|                      |                                                                                           | differentiation and development, apoptosis, DNA repair <i>etc.</i> |                                                                                                                                                                                                                  |                                                                                          |                                                    |
| NANOG overexpression | Increases SMAD2/3 mediated COL3 synthesis<br><br>MRTF-A and SRF dependent gene expression | TGF- $\beta$ 1 pathway<br><br>TGF- $\beta$ 1 and ROCK pathways     | Restoration of COL3 in ECM, reduced senescence, increased cell proliferation, decreased DNA damage<br><br>Induce actin polymerization and restore contractile activity                                           | Human skin fibroblast from HGPS patient<br><br>Human dermal fibroblast from HGPS patient | (Rong et al. 2019)<br><br>(Mistriotis et al. 2017) |
| CRISPR/Cas9 system   | <i>LMNA</i> gene                                                                          | Progerin expression                                                | Extended life span, attenuated body weight loss, improved architecture of gastro-intestinal tissues, reduced epidermal thinning and dermal fat loss, decreased degeneration of VSMC of the aortic arch, lessened | <i>Lmna</i> <sup>G609G/G609G</sup> mouse                                                 | (Beyret et al. 2019)                               |

|  |  |  |                                                                                                                                                                                                                                                                                                                                     |                                                                                                                                                        |                                                                                                                         |
|--|--|--|-------------------------------------------------------------------------------------------------------------------------------------------------------------------------------------------------------------------------------------------------------------------------------------------------------------------------------------|--------------------------------------------------------------------------------------------------------------------------------------------------------|-------------------------------------------------------------------------------------------------------------------------|
|  |  |  | <p>development of bradycardia, increased grip strength.</p> <p>Reduced progerin expression, decreased number of aberrant nuclei</p> <p>Reduced progerin expression, decreased nuclear alterations</p> <p>Reduced progerin expression, increased life span and maximum survival, decreased apoptosis, retarded loss of grooming,</p> | <p>Human skin fibroblast from HGPS patient</p> <p><i>Lmna</i><sup>G609G/G609G</sup> mouse fibroblast</p> <p><i>Lmna</i><sup>G609G/G609G</sup> mice</p> | <p>(Santiago-Fernández et al. 2019)</p> <p>(Santiago-Fernández et al. 2019)</p> <p>(Santiago-Fernández et al. 2019)</p> |
|--|--|--|-------------------------------------------------------------------------------------------------------------------------------------------------------------------------------------------------------------------------------------------------------------------------------------------------------------------------------------|--------------------------------------------------------------------------------------------------------------------------------------------------------|-------------------------------------------------------------------------------------------------------------------------|



|                                                                                               |                                   |                                                      |                                                                                                                                                                                                                                   |                                                                                                                                                                         |                        |
|-----------------------------------------------------------------------------------------------|-----------------------------------|------------------------------------------------------|-----------------------------------------------------------------------------------------------------------------------------------------------------------------------------------------------------------------------------------|-------------------------------------------------------------------------------------------------------------------------------------------------------------------------|------------------------|
|                                                                                               |                                   |                                                      | improved body weight and blood glucose levels, reduced gastric mucosa atrophy, lowered fibrosis in heart and muscle                                                                                                               |                                                                                                                                                                         |                        |
| Stem cell transplantation                                                                     | Cellular reprogramming            | Stem cell regeneration capability                    | Extended life span, weight gain, delayed aging related symptoms, promoted neovascularization several tissues ( <i>viz.</i> muscle, brain), reduced muscle atrophy                                                                 | <i>Ercc1</i> <sup>-/-</sup> and <i>Ercc1</i> <sup>-/Δ</sup> mice                                                                                                        | (Lavasani et al. 2012) |
| Yamanaka transcription factors ( <i>Oct4</i> , <i>Sox2</i> , <i>Klf4</i> , and <i>c-myc</i> ) | Partial reprogramming of the cell | epigenetic alterations, cellular senescence pathways | Moderated spinal curvature, increase in median and maximum life span, augmented epidermal and dermal thickness, reduced keratinization of the skin, improved histological features of multiple organs (skin, spleen, kidneys, and | <i>Lmna</i> <sup>G609G/G609G</sup> (LAKI) mice crossed to mice carrying an OSKM polycystronic cassette (4F) and a rtTA trans-activator, thereby generating LAKI 4F mice | (Ocampo et al. 2016)   |

|  |  |  |                                                                                                                                                                                                                                                                                                                                                                                                                                               |                                                 |                             |
|--|--|--|-----------------------------------------------------------------------------------------------------------------------------------------------------------------------------------------------------------------------------------------------------------------------------------------------------------------------------------------------------------------------------------------------------------------------------------------------|-------------------------------------------------|-----------------------------|
|  |  |  | <p>gastrointestinal tract), decreased VSMC degeneration, rescued development of bradycardia, restored cell proliferation rate, reestablished histone modifications, reduced apoptosis, partial restoration of adult stem cell population</p> <p>Reduced ROS and DNA damage, decreased senescence, lowered expression of senescence associated stress response genes, restored histone methylation, improved nuclear envelope architecture</p> | <p>LAKI 4F mice tail tip fibroblast culture</p> | <p>(Ocampo et al. 2016)</p> |
|--|--|--|-----------------------------------------------------------------------------------------------------------------------------------------------------------------------------------------------------------------------------------------------------------------------------------------------------------------------------------------------------------------------------------------------------------------------------------------------|-------------------------------------------------|-----------------------------|

|                          |                                                                        |                     |                                                                                                                                                                                                                                                                                                                                                                                                                               |                                                                                                                                             |                                                                                          |
|--------------------------|------------------------------------------------------------------------|---------------------|-------------------------------------------------------------------------------------------------------------------------------------------------------------------------------------------------------------------------------------------------------------------------------------------------------------------------------------------------------------------------------------------------------------------------------|---------------------------------------------------------------------------------------------------------------------------------------------|------------------------------------------------------------------------------------------|
| Morpholino antisense RNA | <i>LMNA</i> gene (Correction of aberrant splicing of <i>LMNA</i> gene) | Progerin expression | <p>Restored nuclear structure and expression of misregulated genes, reduced lamin A expression</p> <p>Reduced progerin level, decreased loss of body weight, increased life span, lowered expression of senescence associated markers, thickened subcutaneous fat layer, heightened serum glucose level, a reduced involution of thymus and spleen.</p> <p>Ameliorated nuclear shape abnormalities, increased lamin C but</p> | <p>Human skin fibroblast from HGPS patient</p> <p><i>Lmna</i><sup>G609G/G609G</sup> mice</p> <p>Human skin fibroblast from HGPS patient</p> | <p>(Scaffidi and Misteli 2005)</p> <p>(Osorio et al. 2011)</p> <p>(Lee et al. 2016a)</p> |
|--------------------------|------------------------------------------------------------------------|---------------------|-------------------------------------------------------------------------------------------------------------------------------------------------------------------------------------------------------------------------------------------------------------------------------------------------------------------------------------------------------------------------------------------------------------------------------|---------------------------------------------------------------------------------------------------------------------------------------------|------------------------------------------------------------------------------------------|

|                   |                    |                     |                                                                                                                                                                                   |                                                                                             |                                                        |
|-------------------|--------------------|---------------------|-----------------------------------------------------------------------------------------------------------------------------------------------------------------------------------|---------------------------------------------------------------------------------------------|--------------------------------------------------------|
|                   |                    |                     | <p>reduced lamin A/progerin expression,</p> <p>Reduced progerin, improved aortic pathology.</p> <p>Decreased progerin expression, reduced senescence, improved nuclear shape,</p> | <p><i>Lmna</i><sup>G609G/G609G</sup>mice</p> <p>Human skin fibroblast from HGPS patient</p> | <p>(Lee et al. 2016a)</p> <p>(Harhour et al. 2016)</p> |
| miR-9 (micro RNA) | Lamin A RNA 3'-UTR | Progerin expression | Reduced lamin A/progerin, ameliorated nuclear abnormalities                                                                                                                       | HGPS-iPSC-MS                                                                                | (Nissan et al. 2012)                                   |
| hTERT mRNA        | Telomerase enzyme  | Telomere length     | Increased telomere length, partial restoration of telomere associated proteins, enhanced cell proliferation, reduced senescence, improved nuclear morphology,                     | HGPS cell line                                                                              | (Li et al. 2019)                                       |

|                            |                                   |                  |                                                     |                                             |                    |  |
|----------------------------|-----------------------------------|------------------|-----------------------------------------------------|---------------------------------------------|--------------------|--|
|                            |                                   |                  |                                                     | rescued secretion of inflammatory cytokines |                    |  |
| Human MSC-EVs and iPSC-EVs | Peroxiredoxin antioxidant enzymes | Oxidative stress | Reduced senescence and increased cell proliferation | Progerin overexpressing MSCs                | (Liu et al. 2019b) |  |
